# Supplementary material for: Essential Role of the a3 Isoform of V-ATPase in Secretory Lysosome Trafficking via Rab7 Recruitment
Source: PubMed Central journal article supplement (PMC5928161; doi:10.1038/s41598-018-24918-7), 2018-04-30

**Essential Role of the  $\alpha 3$  Isoform of V-ATPase in Secretory Lysosome Trafficking via Rab7 Recruitment**

Naomi Matsumoto, Mizuki Sekiya, Koujiro Tohyama, Eri Ishiyama-Matsuura, Ge-Hong Sun-Wada, Yoh Wada, Masamitsu Futai, Mayumi Nakanishi-Matsui

**Supplementary Figure S1.** Differentiation of osteoclasts from splenic macrophages.

(a) Differentiation of macrophages into osteoclasts. Macrophages from wild-type (WT) and *a3*-knockout (*a3*KO) mice were obtained as adherent splenic cells after incubation with macrophage colony-stimulating factor for 3 days, cultured in medium containing RANKL for 4 days to induce differentiation and then stained for TRAP. The images are representative of at least nine fields. The bar indicates 50  $\mu$ m. The numbers of TRAP-positive fused cells were counted in nine randomly selected fields (65.7 mm<sup>2</sup>). Data are means  $\pm$  s.e.m.; n.s., not significant (unpaired two-tailed Student's t-test). (b) Resorption activity of wild-type (WT) and *a3*-knockout (*a3*KO) osteoclasts. Osteoclasts were induced as described in a on calcium phosphate-coated dishes and then removed by washing with distilled water. Resorption pits were observed. The images are representative of nine fields. The bar indicates 20  $\mu$ m. Resorption activity was determined by measuring the area of resorption pits in nine randomly selected fields (10.6 mm<sup>2</sup>). Data are means  $\pm$  s.e.m. (c) Images of osteoclasts induced from wild-type (WT) and *a3*-knockout (*a3*KO) macrophages. CD68 (red) and  $\alpha$ -tubulin (green) were stained with specific antibodies. F-actin (blue) was stained with phalloidin. Lateral images (z-x and z-y sections along the yellow lines) are also shown. The image is representative of nine cells. The bar indicates 20  $\mu$ m.

**Supplementary Figure S2.** Localisations of LAMP1 in osteoclasts differentiated from splenic macrophages.

(a) Localisation of LAMP1 in osteoclasts. Osteoclasts were derived from wild-type (WT) and *a3*-knockout (*a3*KO) macrophages as described in Figure 3a. The cells were then fixed and stained for LAMP1 (red) and  $\alpha$ -tubulin (green). F-actin was visualised with phalloidin (white). F-actin labelling is shown in blue in the merged images. Arrows indicate LAMP1 and  $\alpha$ -tubulin at the periphery of wild-type osteoclasts. Arrowheads indicate actin rings. The images are representative of at least ten cells. Bars indicate 20  $\mu$ m. (b) Distribution of LAMP1 in osteoclasts. The distribution of LAMP1 in wild-type and mutant osteoclasts was determined as described in Figure 3e. Blue and magenta indicate osteoclasts derived from wild-type and *a3*-knockout macrophages, respectively. Data are means  $\pm$  s.e.m.; n = 15 cells.

**Supplementary Figure S3.** Expression of the *a1* and *a2* isoforms during differentiation.

Osteoclasts were induced from wild-type (WT) and *a3*-knockout (*a3*KO) splenic macrophages. Lysates were prepared after the indicated number of days and subjected to Western blotting using antibodies specific for the *a1* and *a2* isoforms, and  $\beta$ -actin. Numbers below blots represent relative signal intensities of *a* isoform normalised to that at day 0. Unprocessed scans of immunoblots are shown in Supplementary Figure S6.

**Supplementary Figure S4.** Effects of Rab protein expression on the peripheral localisation of CD68 after differentiation.

(a) Expression of EGFP-Rab7 variants in osteoclasts. Wild-type osteoclasts induced from macrophages were infected with an adenovirus carrying a gene encoding EGFP-Rab7 and cultured for a further 24 h.

Cell lysates were subjected to gel electrophoresis. EGFP-Rab7 was detected with antibodies specific for GFP (upper panel, magenta arrow) and Rab7 (lower panel, magenta arrow). Endogenously expressed Rab7 and  $\beta$ -actin were also detected using the corresponding antibodies (lower panel, closed arrow; upper panel, blue arrow, respectively). WT, DN and CA indicate cells expressing wild-type, dominant-negative (GDP-bound) and constitutively active (GTP-bound) Rab7, respectively. Control indicates non-infected cells. Arrowheads indicate the positions of the 50, 37 and 25 kDa molecular mass markers. Numbers below blots represent relative signal intensities of EGFP-fused (magenta) and endogenous (black) Rab7 normalised to that of EGFP-fused wild-type Rab7. Unprocessed scans of immunoblots are shown in Supplementary Figure S6. **(b)** Effects of EGFP-Rab7 variants on the peripheral localisation of CD68. Osteoclasts expressing EGFP-Rab7 variants were prepared as described in **a** and stained with antibodies against CD68 (red) and  $\alpha$ -tubulin (white). EGFP-Rab7 variants were detected by observing EGFP via fluorescence microscopy (green). Merged images (Merge) are also shown.  $\alpha$ -tubulin labelling is shown in blue in the merged images. WT, DN, CA and Control are as described in **a**. The images are representative of at least three cells. The bar indicates 20  $\mu$ m.

**Supplementary Figure S5.** Effects of Rab11B and Rab27A expression on the peripheral localisation of CD68.

**(a–c)** Splenic macrophages from wild-type mice were infected with a retrovirus carrying a gene encoding a FLAG-tagged Rab11B **(a)** or Rab27A **(b)** variant (wild-type, dominant-negative or constitutively active). In addition, macrophages from *a3*-knockout mice were infected with a retrovirus carrying a gene encoding FLAG-tagged wild-type Rab27A **(c)**. Thereafter, infected cells were cultured with RANKL for 6 days. Osteoclasts expressing Rab protein were stained with antibodies against FLAG (green), CD68 (red) and  $\alpha$ -tubulin (white). Merged images (Merge) are also shown.  $\alpha$ -tubulin labelling is shown in blue in the merged images. WT, DN and CA indicate cells expressing wild-type, dominant-negative (GDP-bound) and constitutively active (GTP-bound) Rab proteins, respectively. Control indicates cells infected with an empty vector. The boxed images are the same with those shown in Figure 5b (FLAG-Rab11B DN and FLAG-Rab27A DN). The images are representative of at least nine cells. The bar indicates 20  $\mu$ m.

**Supplementary Figure S6.** Unprocessed scans of immunoblots.

#### **Supplementary Table Legends.**

**Supplementary Table S1.** Information on antibodies used for this study.

**Supplementary Table S2.** Information on primers used for RT-PCR.

**Supplementary Table S3.** Statistics source data.

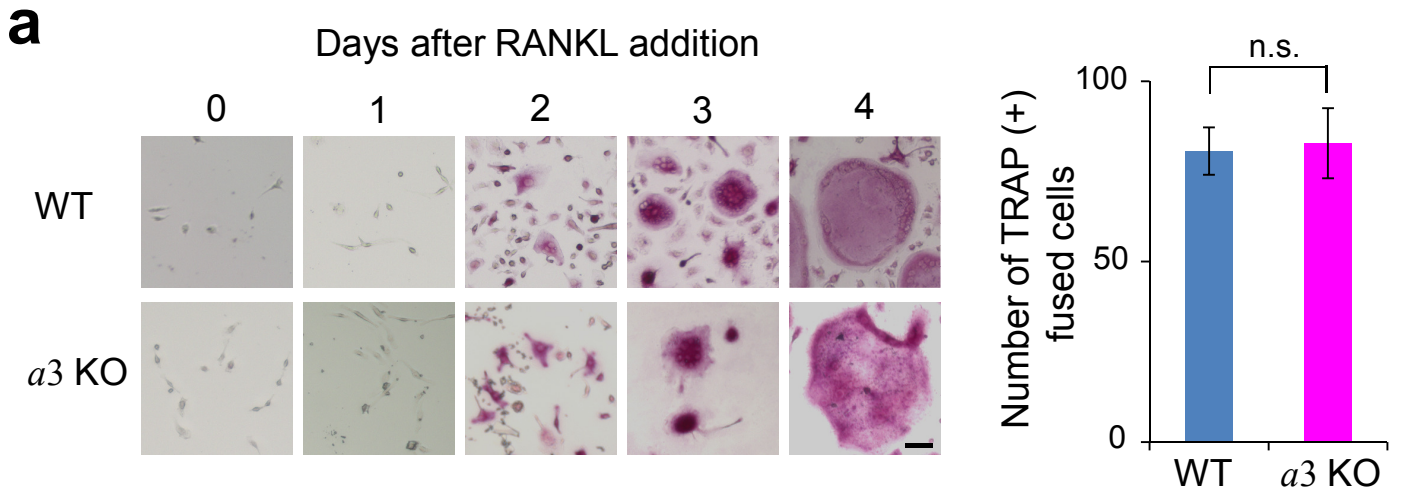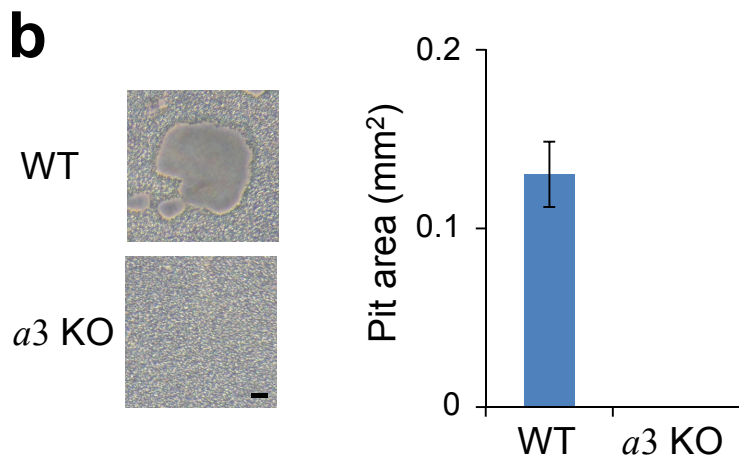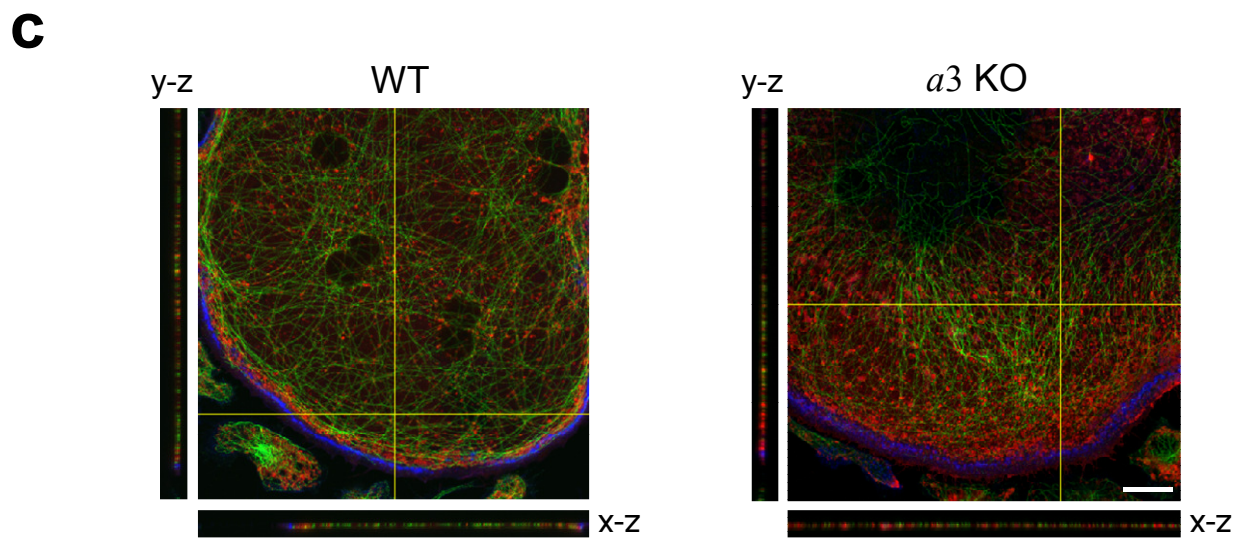

Supplementary Figure S1

**a**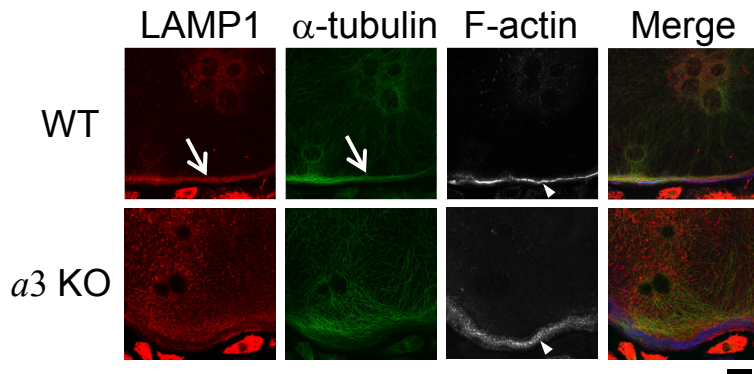**b**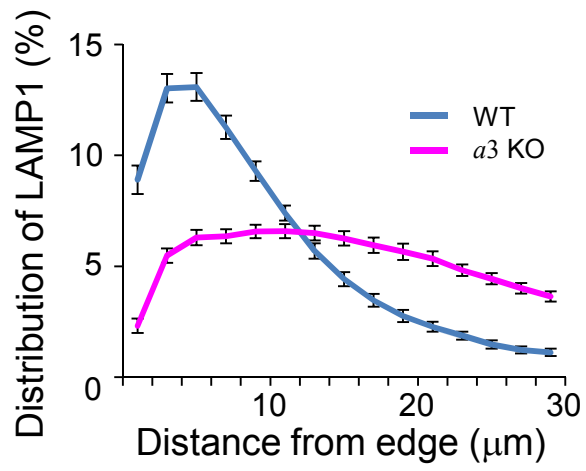

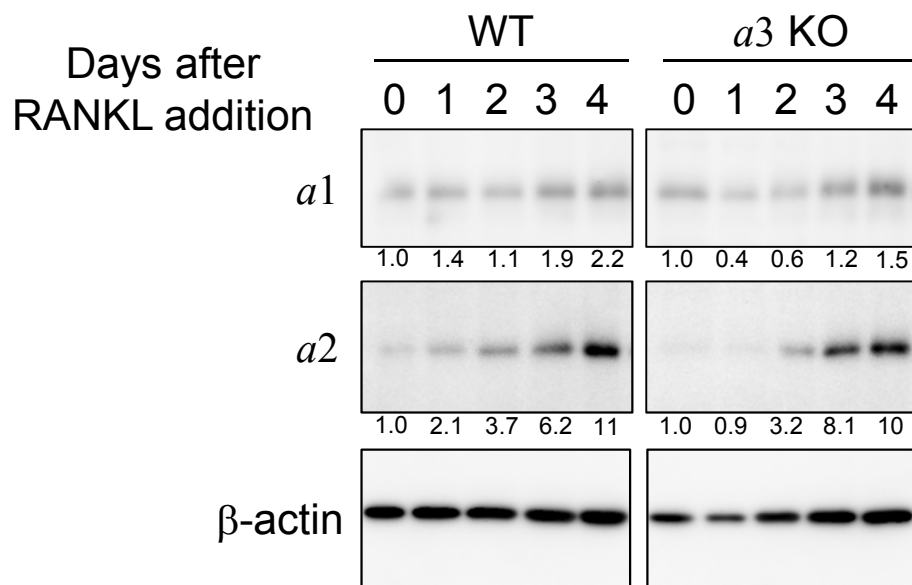

Supplementary Figure S3

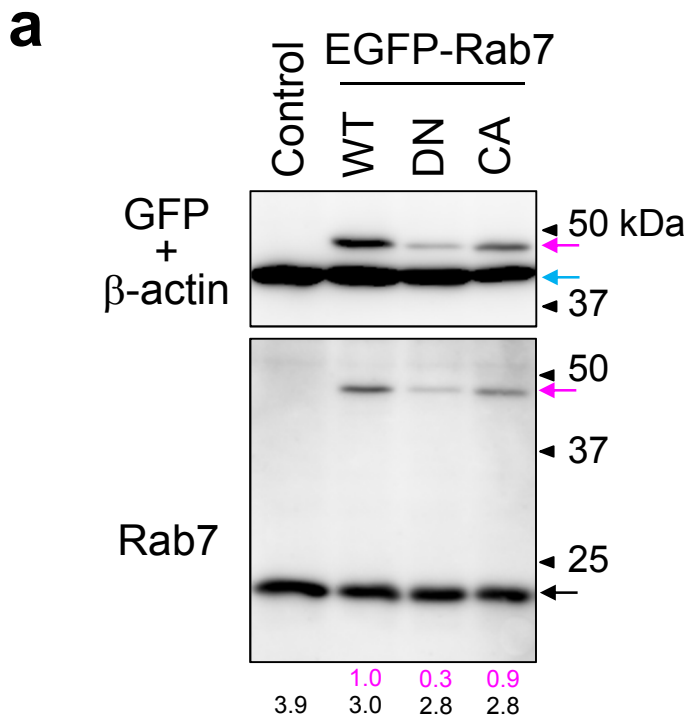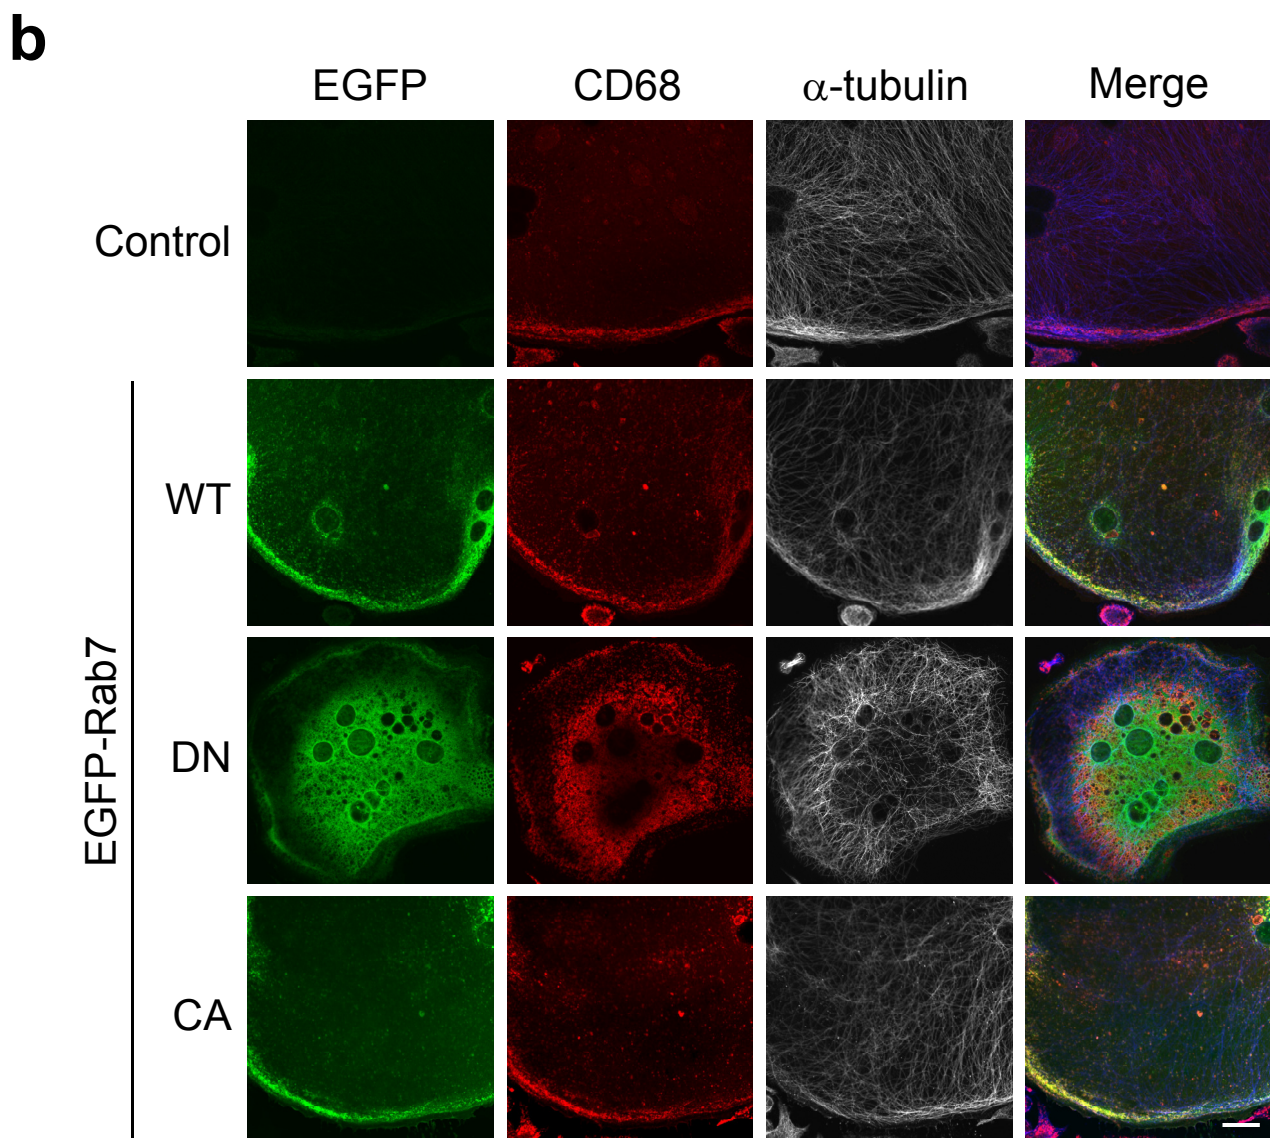

Supplementary Figure S4

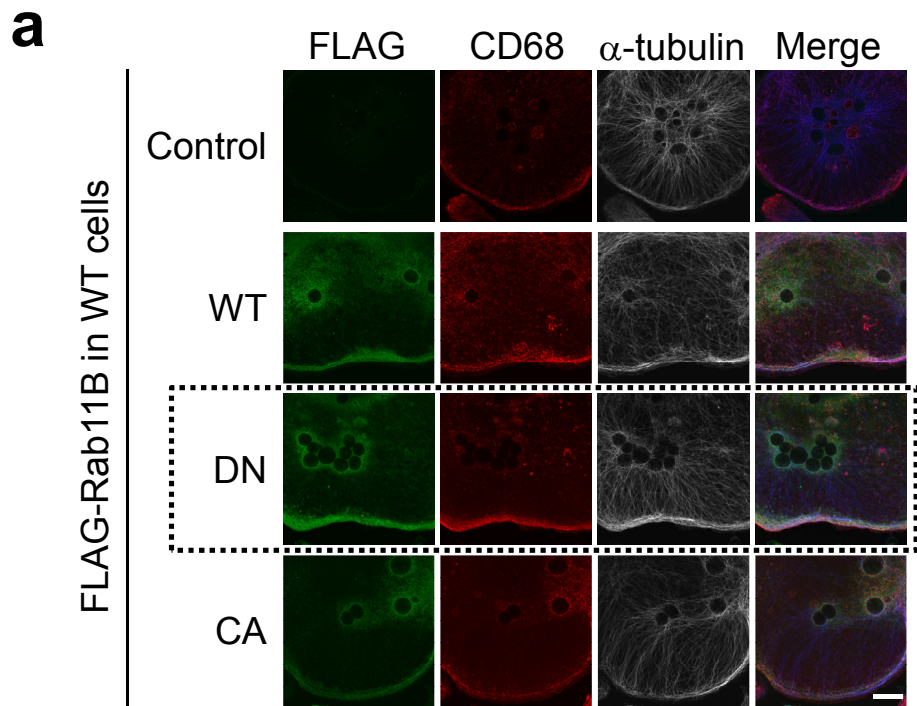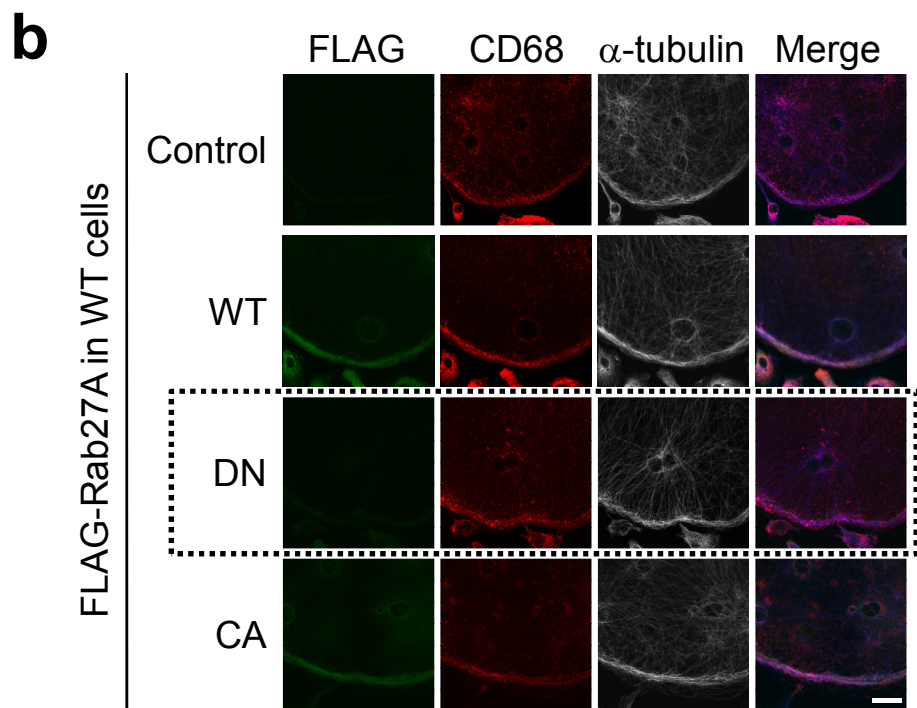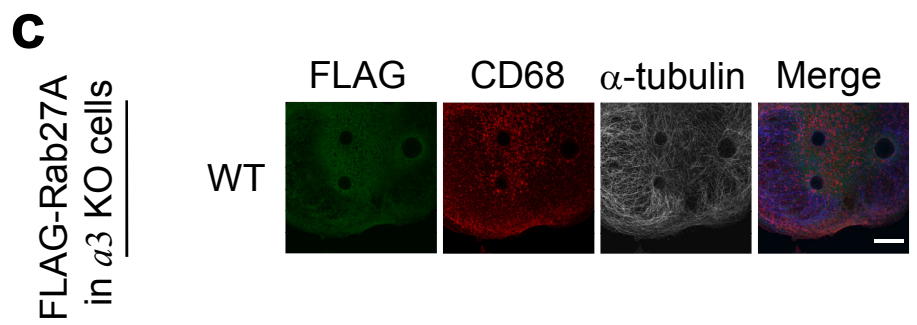

Supplementary Figure S5



Fig. 4a

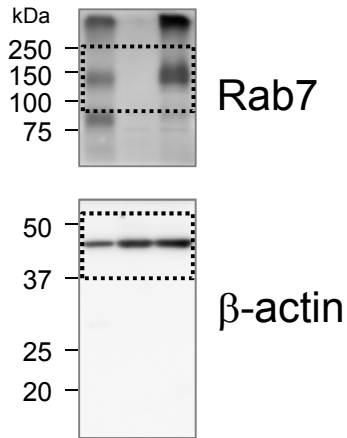

Fig. 6a

+ Rab7

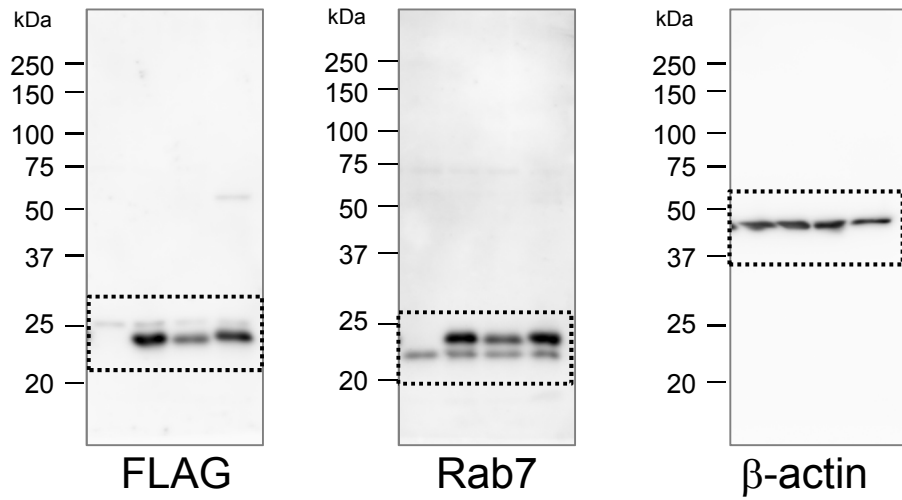

+ Rab11B

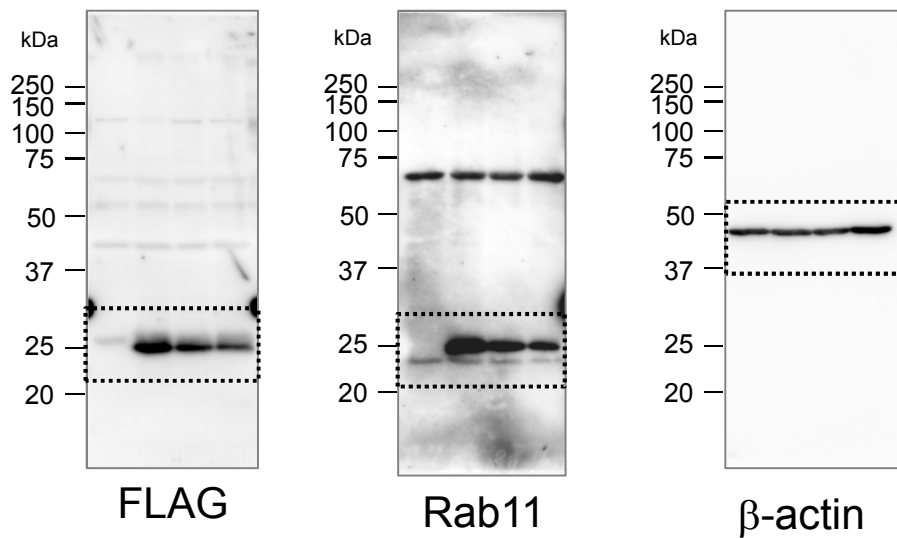

Fig. 6a

+ Rab27A

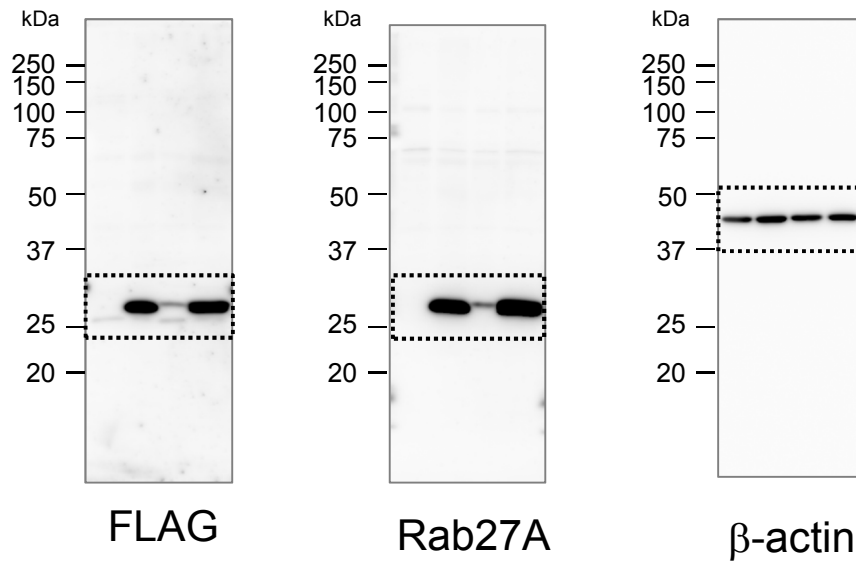

Fig. 7d

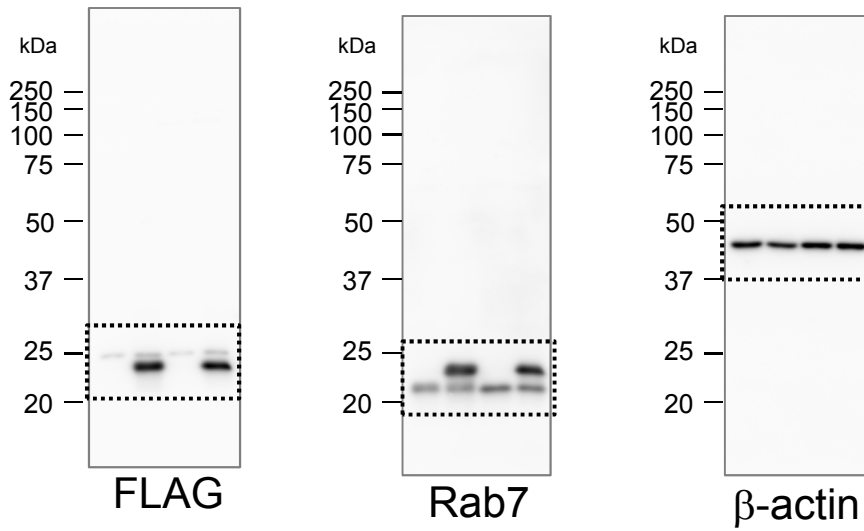

Fig. 8a

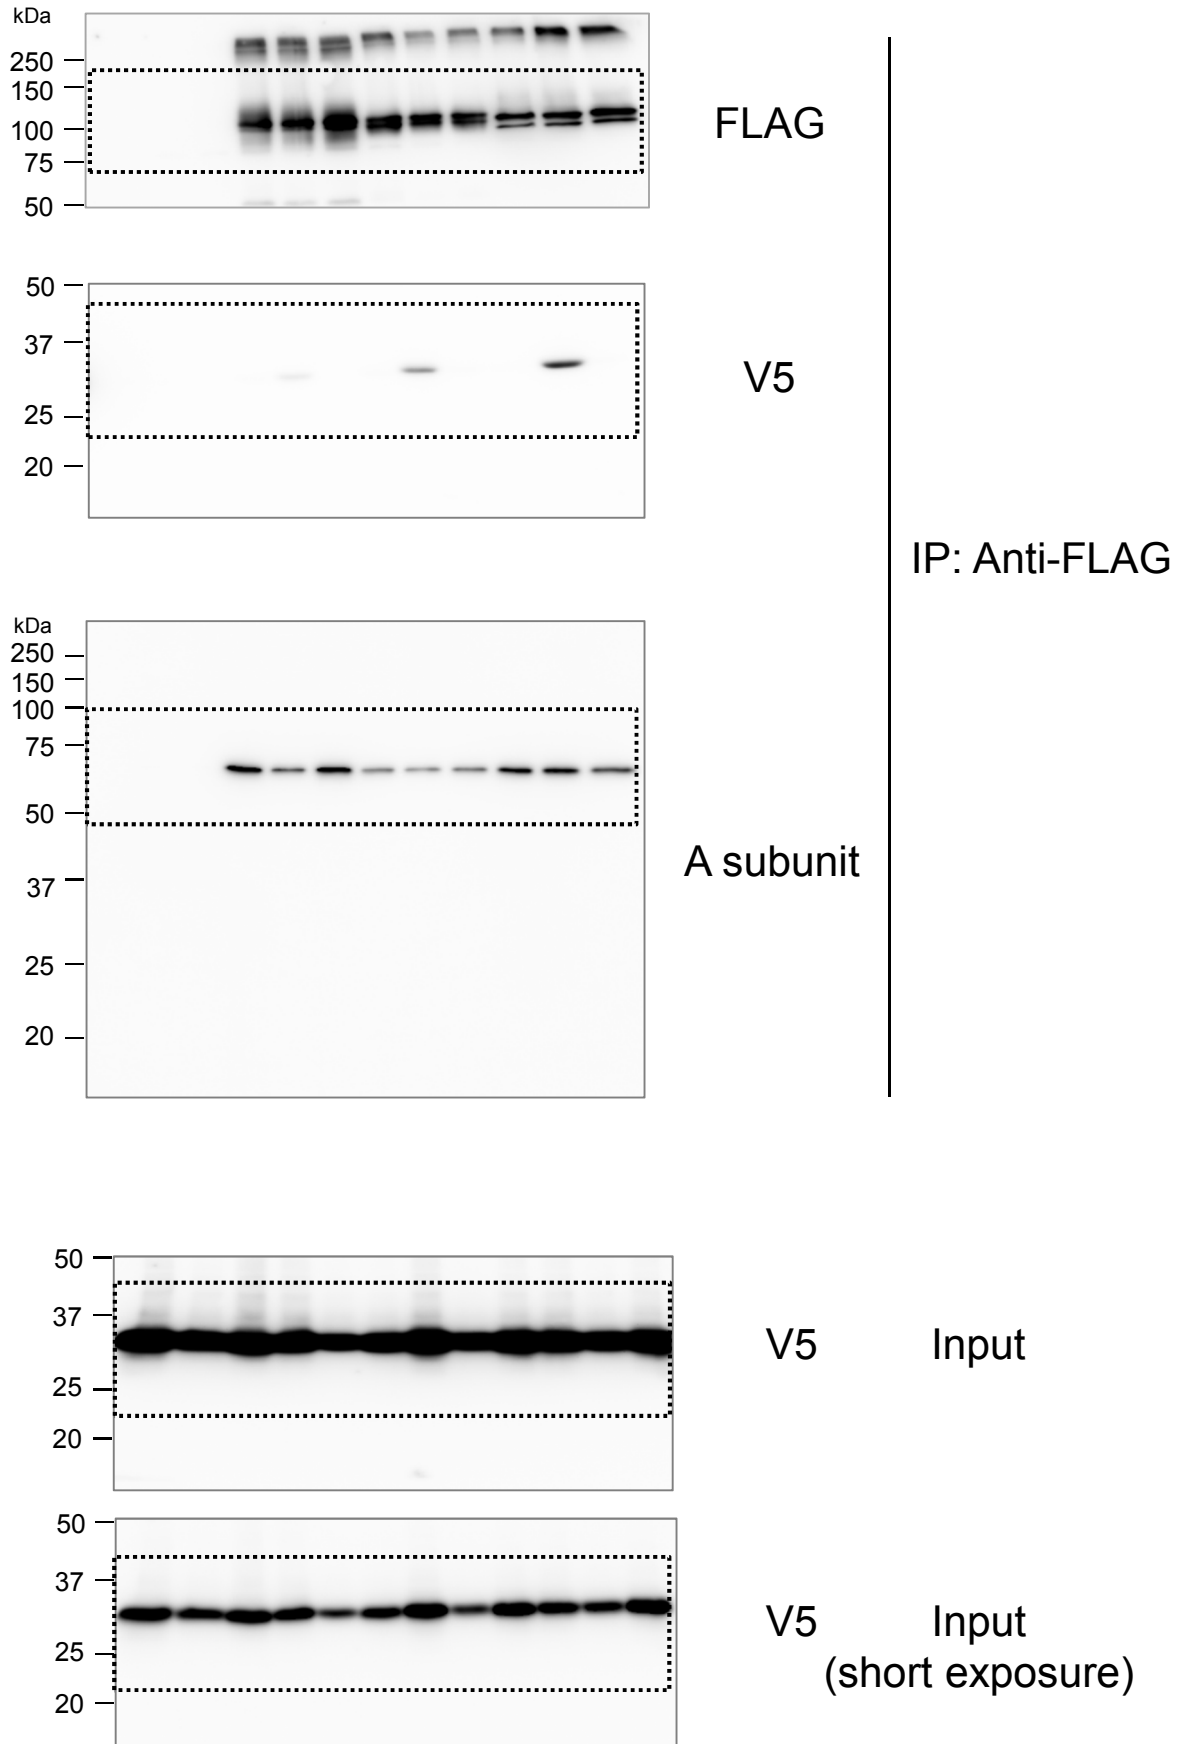

Supplementary Figure S6

Fig. 8b

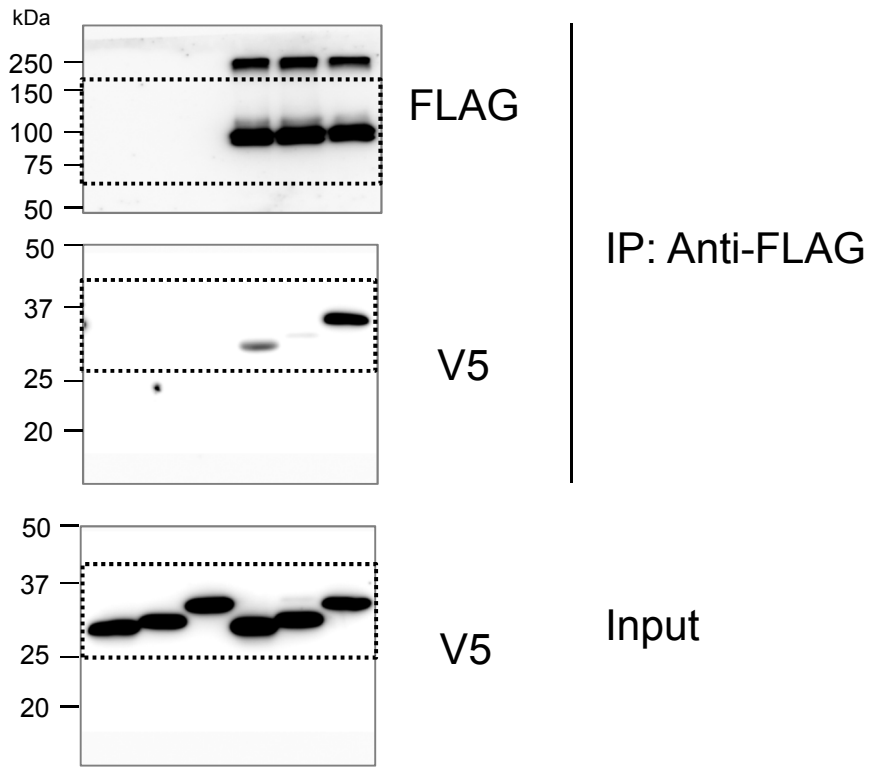

Fig. 8c

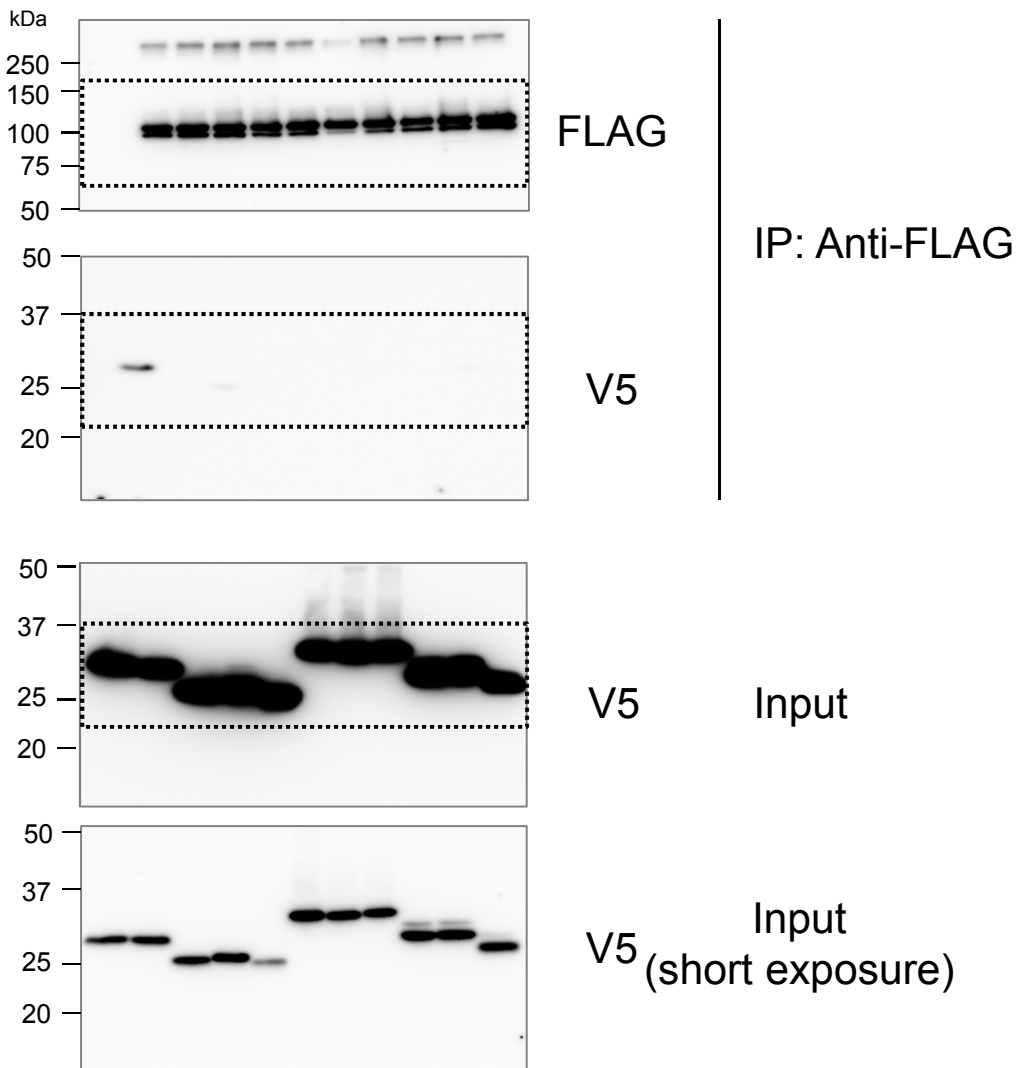

Supplementary Figure S6

Fig. S3

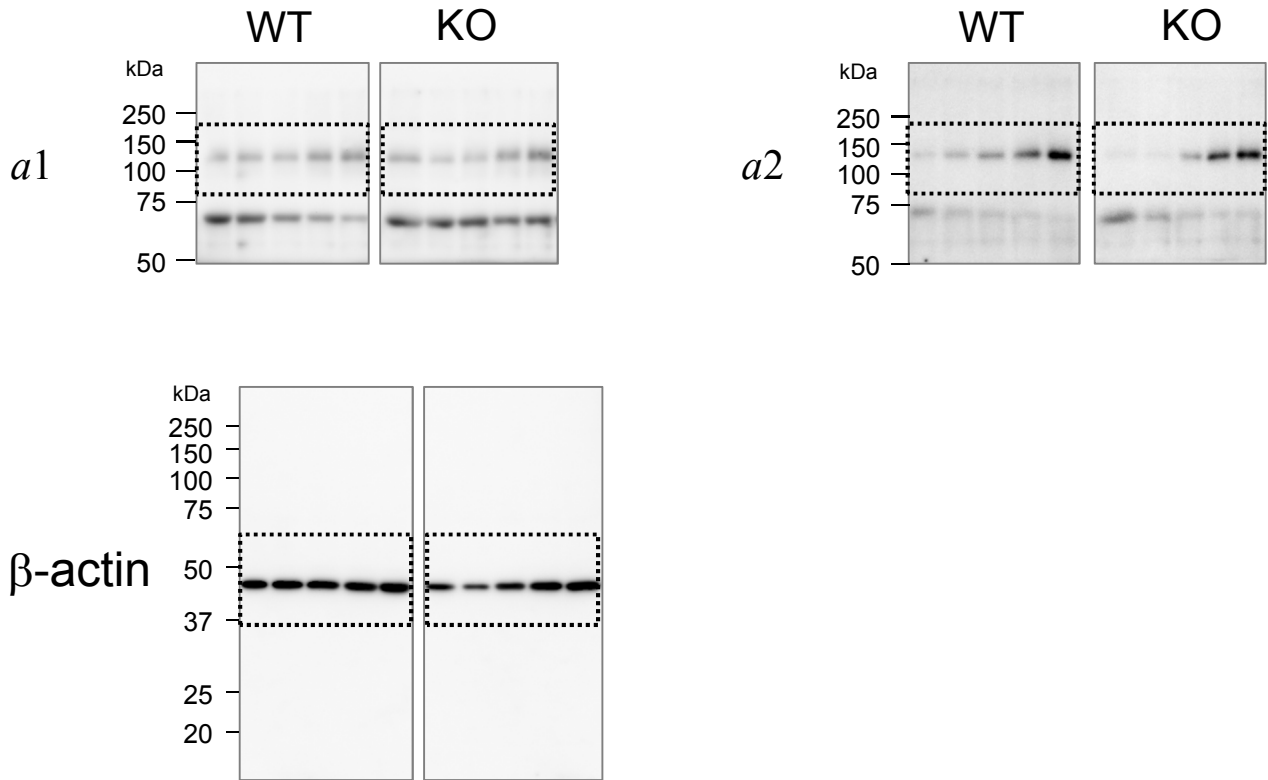

Fig. S4

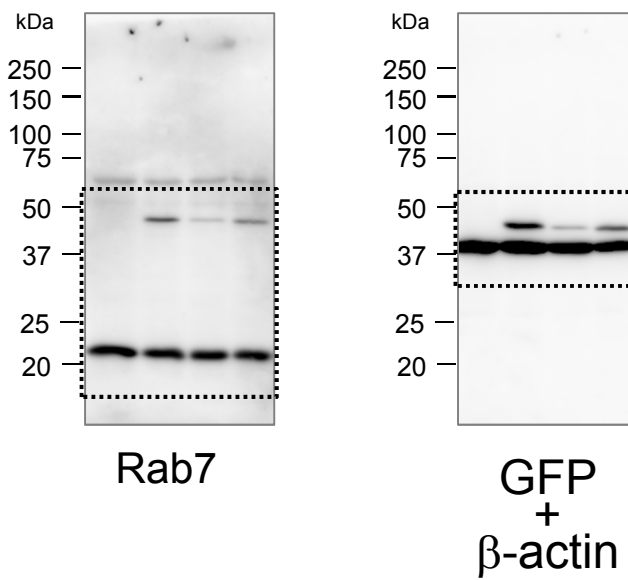

Supplement: 41598_2018_24918_MOESM1_ESM.pdf [file 41598_2018_24918_MOESM1_ESM.pdf]
